# Supplementary material for: A Conjugate of Pentamethine Cyanine and 18F as a Positron Emission Tomography/Near-Infrared Fluorescence Probe for Multimodality Tumor Imaging
Source: PubMed Central journal article supplement (PMC5486037; doi:10.3390/ijms18061214), 2017-06-07
Supplement: ijms-18-01214-s001.pdf [file ijms-18-01214-s001.pdf]

# A conjugate of pentamethine cyanine and $^{18}\text{F}$ as a positron emission tomography/near-infrared fluorescence probe for multimodality tumor imaging

Fei-Fei An, Harikrishna Kommidi, Nandi Chen and Richard Ting

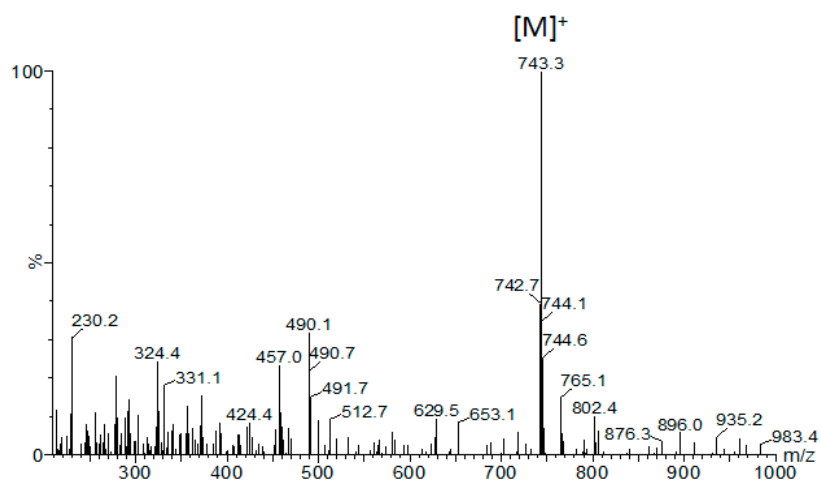

**Figure S1.** The mass spectrum of Cy5. Calculated for  $[\text{M}]^+ = (\text{C}_{37}\text{H}_{47}\text{N}_2\text{O}_{10}\text{S}_2)^+ = 743.3$  m/z, Observed  $[\text{M}]^+ = 743.3$  m/z.

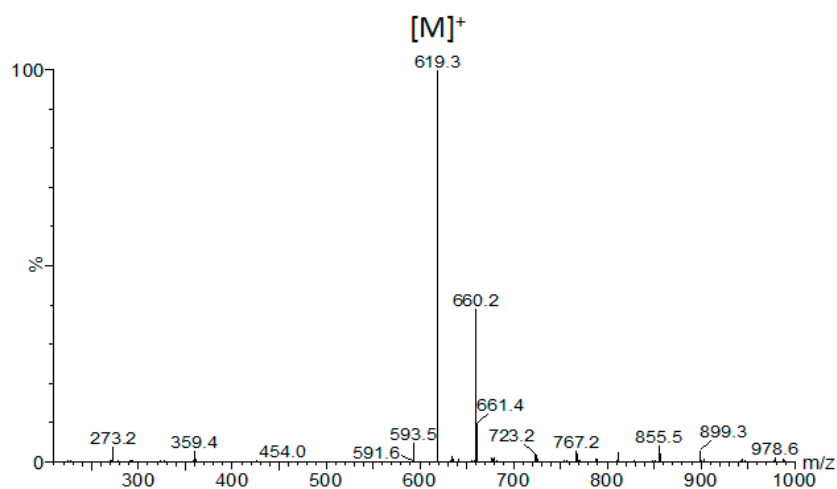

**Figure S2.** The mass spectrum of boronate. Calculated for  $[\text{M}+\text{H}]^+ (\text{C}_{37}\text{H}_{31}\text{BF}_3\text{N}_2\text{O}_3)^+ = 619.2$ , Observed  $[\text{M}]^+ = 619.3$  m/z.

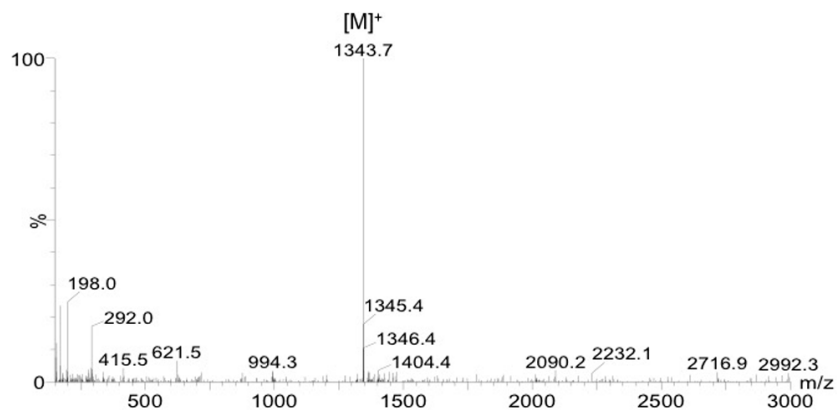

**Figure S3.** The mass spectrum of Cy5-B. Calculated for  $[M]^+ = (C_74H_{75}BF_3N_4O_{12}S_2)^+ = 1343.5$  *m/z*. Observed  $[M]^+ = 1343.7$  *m/z*.

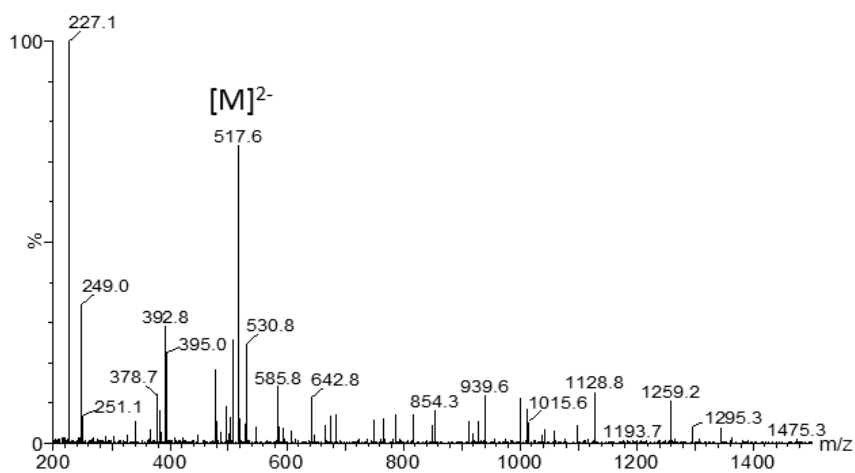

**Figure S4.** The mass spectrum of Cy5-BF<sub>3</sub>. Calculated for  $[M]^+ = (C_{48}H_{55}BF_6N_4O_{10}S_2)^+ = 1034.3$  *m/z*,  $[M]^{2-} = 517.2$  *m/z*, Observed  $[M]^{2-} = 517.6$  *m/z*.

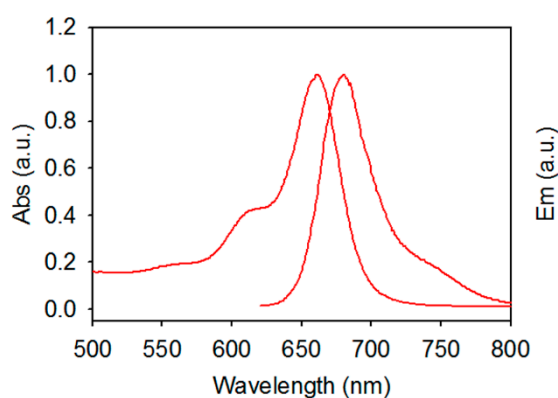

**Figure S5.** The absorption spectrum and emission spectrum of Cy5 in DMSO (Ex = 600 nm, Em = 680 nm).

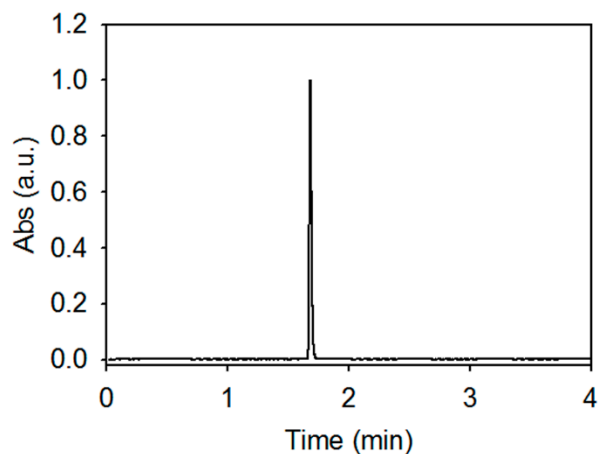

**Figure S6.** The HPLC profile of Cy5-B monitored at 650 nm wavelength (Reverse phase HPLC were performed on a Waters Acquity H class HPLC/ SQD2 mass spectrometer and a Phenomenex Kinetex 1.7  $\mu\text{m}$  C18 100 $\text{\AA}$ , 50 cm  $\times$  2.1 mm I.D. column (00B-4475-AN), with a 1.5 min, a10-90% H<sub>2</sub>O:acetonitrile (ACN) (0.05% TFA) gradient and a flow rate of 0.6 mL/min.

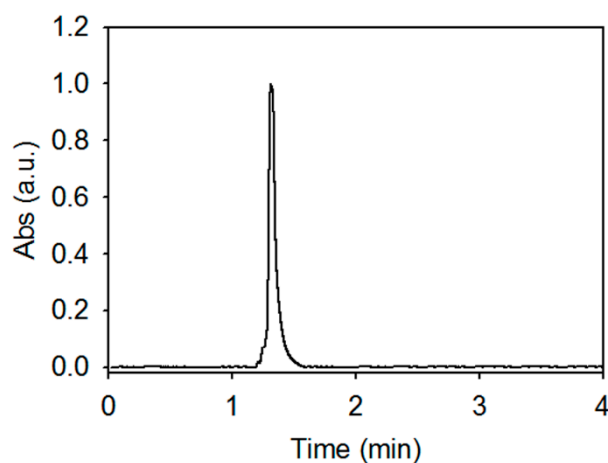

**Figure S7.** The HPLC profile of 19F-Cy5-BF<sub>3</sub> monitored at 650 nm wavelength (Reverse phase HPLC were performed on a Waters Acquity H class HPLC/ SQD2 mass spectrometer and a Phenomenex Kinetex 1.7 $\mu\text{m}$  C18 100 $\text{\AA}$ , 50 cm  $\times$  2.1 mm I.D. column (00B-4475-AN), with a 1.5 min, a10-90% H<sub>2</sub>O:acetonitrile (ACN) (0.05% TFA) gradient and a flow rate of 0.6 mL/min.

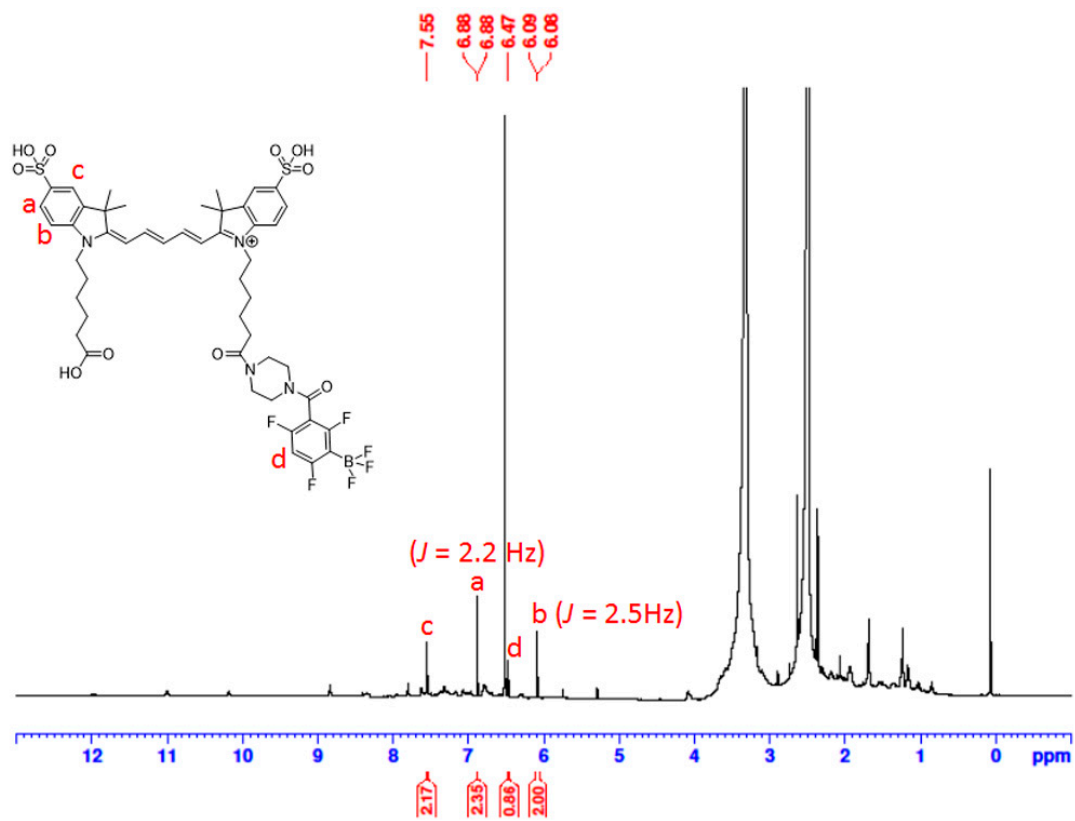

Figure S8. <sup>1</sup>H NMR (500 MHz, d<sub>6</sub>-DMSO, 21 °C, TMS) for Cy5-BF<sub>3</sub> (F-19).

### **Procedure for preparing of $^{18}\text{F}$ -ion water**

One will need a glass v-vial (A Thermo Scientific Reacti-Vial #13223 is recommended), 40 psi nitrogen (from a low-pressure nitrogen cylinder), and a 1.2 M HF solution. We recommend working with low volumes of HF (< 200  $\mu\text{L}$ ).

In a typical labeling, a 700  $\mu\text{L}$  volume of [ $^{18}\text{F}$ ]-fluoride-ion-containing water produced from a 19.2 MeV bombardment of [ $^{18}\text{O}$ ]-water is flushed from a cyclotron target into a Teflon septa-sealed 5.0mL glass v-vial (Thermo Scientific Reacti-Vial #13223). The vial is transferred to a 100  $^{\circ}\text{C}$  heat block and is flushed with 40 psi  $\text{N}_2$  gas through an 18 G inlet.  $\text{N}_2$  flow is vented through 16 G tubing and bubbled through a 1 M solution of NaOH to prevent radioactive volatilization. In 15 to 22 min, the solution of [ $^{18}\text{F}$ ]-fluoride is concentrated to a ~20–30  $\mu\text{L}$  volume. It is important not to dry the [ $^{18}\text{F}$ ]-fluoride completely to obtain maximum [ $^{18}\text{F}$ ]-fluoride recovery.

A 10  $\mu\text{L}$  volume containing ~ 100 mCi of  $^{18}\text{F}$ -ion is added to 10  $\mu\text{L}$  of a 1.2 M HF solution to give a 20  $\mu\text{L}$  HF solution (0.6 M in water) containing 100 mCi of  $^{18}\text{F}$ -ion.

### **$^{18}\text{F}$ -ion water Reaction with Cy5-B**

The prepared  $^{18}\text{F}$ -ion water solution is incubated with equivolume quantities of Cy5-B to generate the  $^{18}\text{F}$ -labeled fluorescent dye. A 1 h incubation at 50  $^{\circ}\text{C}$  is more than sufficient for complete Cy5-B conversion. This time is unoptimized. In the future, this synthesis can be made to proceed more rapidly using higher temperatures and/or a microwave reactor.
